# Supplementary figures and images for: Swelling-induced structural changes and microparticle uptake of gelatin gels probed by NMR and CLSM
Source: Royal Society of Chemistry journal article supplement (doi:10.1039/c6sm02811j), 2017-01-01

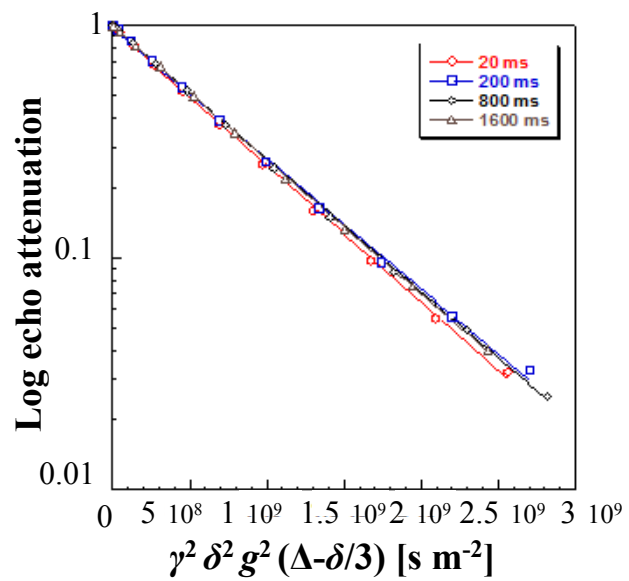

Supplement: c6sm02811j1.pdf [file c6sm02811j1.pdf]
